# Supplementary material for: Second-order nonlinear optical properties of [60]fullerene-fused dihydrocarboline derivates: a theoretical study on switch effect
Source: Royal Society of Chemistry journal article supplement (doi:10.1039/c9tc04126e), 2019-01-01
Supplement: c9tc04126e1.pdf [file c9tc04126e1.pdf]

## Supplementary Information

### Second-order nonlinear optical properties of [60]fullerene-fused dihydrocarboline derivatives: a theoretical study on switch effect

Nana Ma,\* Mingyue Lv, Tongxin Liu, Mengxiao Song, Yan Liu and Guisheng Zhang\*

School of Chemistry and Chemical Engineering, Henan Key Laboratory of Organic Functional Molecule and Drug Innovation, Key Laboratory of Green Chemical Media and Reactions, Ministry of Education, Henan Key Laboratory of Boron Chemistry and Advanced Energy Materials, Henan Normal University, Xinxiang, Henan, 453007, China

### Contents

**Table S1** The calculated  $\beta_{\text{tot}}$  values ( $\times 10^{-30}$  esu) of **I**, **II-2**, **III**, **IV**, **V** and **VI** by  $\omega$ B97XD functionals with 6-31+G(d) and 6-31+G(d,p) basis sets.

**Table S2** The calculated  $\beta_{\text{tot}}$  values ( $\times 10^{-30}$  esu) of **II-2**, **III**, **V** and their reduced states at  $\omega$ B97XD/6-31+G(d) level.

**Table S1** The calculated  $\beta_{\text{tot}}$  values ( $\times 10^{-30}$  esu) of **I**, **II-2**, **III**, **IV**, **V** and **VI** by  $\omega$ B97XD functionals with 6-31+G(d) and 6-31+G(d,p) basis sets.

| System      | $\omega$ B97XD/6-31+G(d) | $\omega$ B97XD/6-31+G(d,p) |
|-------------|--------------------------|----------------------------|
| <b>I</b>    | 17.6                     | 17.5                       |
| <b>II-2</b> | 26.0                     | 25.9                       |
| <b>III</b>  | 40.2                     | 40.0                       |
| <b>IV</b>   | 50.7                     | 50.3                       |
| <b>V</b>    | 9.3                      | 9.6                        |
| <b>VI</b>   | 0.6                      | 0.67                       |

**Table S2** The calculated  $\beta_{\text{tot}}$  values ( $\times 10^{-30}$  esu) of **II-2**, **III**, **V** and their reduced states at  $\omega$ B97XD/6-31+G(d) level.

| System                 | $\beta_{\text{tot}}$ | System                  | $\beta_{\text{tot}}$ | System                | $\beta_{\text{tot}}$ |
|------------------------|----------------------|-------------------------|----------------------|-----------------------|----------------------|
| <b>II</b>              | 26.0                 | <b>III</b>              | 40.2                 | <b>V</b>              | 9.3                  |
| <b>II<sup>-</sup></b>  | 42                   | <b>III<sup>-</sup></b>  | 53                   | <b>V<sup>-</sup></b>  | 280                  |
| <b>II<sup>2-</sup></b> | 1506                 | <b>III<sup>2-</sup></b> | 4662                 | <b>V<sup>2-</sup></b> | 4442                 |
| <b>II<sup>3-</sup></b> | 1131                 | <b>III<sup>3-</sup></b> | 992                  | <b>V<sup>3-</sup></b> | 927                  |
